# Supplementary material for: Ion-exchanged route synthesis of Fe2N–N-doped graphitic nanocarbons composite as advanced oxygen reduction electrocatalyst
Source: Royal Society of Chemistry journal article supplement (doi:10.1039/c3cc40971f), 2013-01-01
Supplement: c3cc40971f.pdf [file c3cc40971f.pdf]

## Supporting Information

### **Ion-exchanged route synthesis of Fe<sub>2</sub>N/N-doped graphitic nanocarbons composite as advanced oxygen reduction electrocatalyst**

Lei Wang,<sup>a,b</sup> Jie Yin,<sup>a</sup> Lu Zhao,<sup>a</sup> Chungui Tian,<sup>a</sup> Peng Yu,<sup>a</sup> Jianqiang Wang,<sup>\*c</sup> and Honggang Fu<sup>\*a,b</sup>

<sup>a</sup>*Key Laboratory of Functional Inorganic Material Chemistry, Ministry of Education of the People's Republic of China, Heilongjiang University, Harbin 150080 P. R. China*

<sup>b</sup>*State Key Laboratory of Theoretical and Computation Chemistry, Jilin University, Changchun 130023, P. R. China*

<sup>c</sup>*Shanghai Institute of Applied Physics, Chinese Academy of Sciences, 239 Zhang Heng Road, Pudong District, Shanghai 201204, P. R. China*

## Experimental section

### Synthesis of Fe<sub>2</sub>N/NGC composites

In a typical synthesis, 2.54 g FeCl<sub>2</sub> was dissolved in 120 mL deionized water and then 8.5 g of polyacrylic weak-acid cation-exchanged resin (PWAR) were added. After magnetic stirring 6 h at room temperature, the process of Fe<sup>2+</sup> ions coordinated with PWAR to form Fe<sup>2+</sup>-PWAR precursor was achieved. The Fe<sup>2+</sup>-PWAR precursor was firstly carbonized in a tube furnace at 1000 °C for 1h with a flowing argon rate of 80 mL min<sup>-1</sup>, then ammonia was introduced to the tube furnace and further kept at this temprature for 2 h (the v/v ratio of NH<sub>3</sub>/Ar is 1:2). Finally, the Fe<sub>2</sub>N/NGC1-1000 was obtained. In order to study the effect of heated temperature and catalyst content on the ORR performance, the samples of Fe<sub>2</sub>N/NGC1-900, Fe<sub>2</sub>N/NGC1-1100, Fe<sub>2</sub>N/NGC2-1000, Fe<sub>2</sub>N/NGC3-1000 were also synthesized (the detailed experimental parameters were displayed in **Table S1**). Besides, the NGC was prepared by using 3 mol L<sup>-1</sup> HCl to remove the metal nanoparticles in Fe<sub>2</sub>N/NGC1-1000 for comparison.

**Table S1** The experimental parameters of the synthesized Fe<sub>2</sub>N/NGC composites.

| Samples                     | The dosage of                    | Heated temperature | Fe <sub>2</sub> N content calculated from TG |
|-----------------------------|----------------------------------|--------------------|----------------------------------------------|
|                             | catalyst (FeCl <sub>2</sub> , g) | (°C)               | analyses (%)                                 |
| Fe <sub>2</sub> N/NGC1-900  | 2.54                             | 900                | 26.3                                         |
| Fe <sub>2</sub> N/NGC1-1000 | 2.54                             | 1000               | 26.3                                         |
| Fe <sub>2</sub> N/NGC1-1100 | 2.54                             | 1100               | 26.3                                         |
| Fe <sub>2</sub> N/NGC2-1000 | 1.27                             | 1000               | 10.8                                         |
| Fe <sub>2</sub> N/NGC3-1000 | 3.81                             | 1000               | 56.2                                         |

## Materials Characterization

X-ray diffraction (XRD) analyses were performed on a Bruker D8 Advance diffractometer equipped with Cu K $\alpha$  ( $\lambda = 1.5406 \text{ \AA}$ ) radiation and a LynxEye Detector. X-ray photoemission spectroscopy (XPS) studies were carried out on a Kratos-AXIS UL TRA DLD with Al K $\alpha$  radiation source. The X-ray absorption spectra at Fe K-edge near the edge structure was recorded at a transmission mode by using ion chambers at beam line BL14W1 of the Shanghai Synchrotron Radiation Facility (SSRF) of China. The station was operated with a Si (111) double-crystal monochromator. The data were processed by using the program ATHENA, and all fits of the EXAFS data were performed with the program ARTEMIS.<sup>[S1]</sup> Raman spectra were taken out with a Jobin Yvon HR 800 micro-Raman spectrometer at 457.9 nm. Transmission electron microscopy (TEM) characterization was tested on a JEM-2100 electron microscope (JEOL) with an acceleration voltage of 200 kV. The weigh percents of Fe<sub>2</sub>N in Fe<sub>2</sub>N/NGC samples were analyzed by thermogravimetric (TG, SDTQ600).

## Electrochemical measurements

The catalytic activity of the electrocatalysts for the ORR was carried out with a three-electrode system by using a Pine Instrument biopotentiostat. A rotating ring-disk electrode (RRDE) with a Pt ring (inner/outer-ring diameter: 6.25/7.92 mm) and a glassy carbon disk (diameter: 5.61 mm) was used as the working electrode. A home-made reversible hydrogen electrode (RHE) and platinum foil (1.0 cm<sup>2</sup>) were used as the reference electrode and the counter electrode, respectively. All electrochemical data were obtained at 25 °C. The working electrode was prepared as follows: A mixture of the electrocatalyst (5.0 mg), ethanol

(1.9 mL), and Nafion suspension (0.1 mL, 0.5 wt.%, DuPont, USA) was placed in an ultrasound bath for 30 min to obtain a well-dispersed electrocatalyst “ink”. Then, 30  $\mu\text{L}$  of the electrocatalyst as-prepared ink was dropped onto the surface of the glassy carbon disk of the RRDE by using a microsyringe. After drying under an IR lamp, a thin-layer electrocatalyst was obtained. The ORR activities of the electrocatalysts were tested in  $\text{O}_2$ -saturated 0.1 mol  $\text{L}^{-1}$  KOH aqueous solution in the potential range of 0.1~1.1 V (vs RHE) with a scan rate of 5  $\text{mV s}^{-1}$ . The ring potential was held at 1.2 V versus RHE. The specific kinetic current densities ( $j_k$ ) associated with the intrinsic activity of the catalysts can be obtained by Koutecky-Levich equation (eq 1):

$$\frac{1}{j} = \frac{1}{j_k} + \frac{1}{j_d} = \frac{1}{j_k} + \frac{1}{B\omega^{1/2}} \quad (1)$$

where  $j_k$  is the kinetic current density,  $j_d$  is the diffusion-limited current density,  $\omega$  is the angular frequency of rotation. The B parameter is defined as eq 2:

$$B = 0.62nFC_o D_o^{3/2} \nu^{-1/6} \quad (2)$$

where  $n$  is the overall number of electrons,  $F$  is the Faraday constant (96485  $\text{C mol}^{-1}$ ),  $C_o$  is the concentration of molecular oxygen in the electrolyte ( $1.2 \times 10^{-6} \text{ mol cm}^{-3}$ ),  $D_o$  is the diffusion coefficient of the molecular  $\text{O}_2$  in 0.1 M KOH solution ( $1.9 \times 10^{-5} \text{ cm}^2 \text{ s}^{-1}$ ), and  $\nu$  is the viscosity of the electrolyte ( $0.01 \text{ cm}^2 \text{ s}^{-1}$ ).<sup>[S2]</sup> The electron transfer number ( $n$ ) were determined by the followed equations (eq 3):

$$n = 4 \times \frac{I_d}{I_d + I_r / N} \quad (3)$$

where  $I_r$  is ring current,  $I_d$  is disk current, and  $N$  is current collection efficiency of the Pt ring ( $N=0.37$ ).

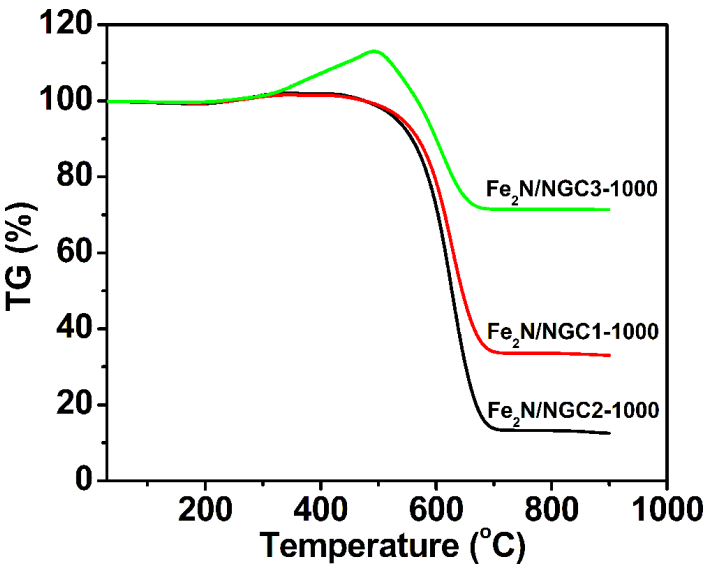

**Fig. S1.** TG curves of the Fe<sub>2</sub>N/NGC samples in air at 5 °C min<sup>-1</sup> (30~900 °C).

**Table S2** TG analyses results derived from **Fig. S1**.

| Sample                      | Final residual mass after                     | Fe content calculated                       | Fe <sub>2</sub> N content calculated        |
|-----------------------------|-----------------------------------------------|---------------------------------------------|---------------------------------------------|
|                             | TG tests (Fe <sub>2</sub> O <sub>3</sub> , %) | based on Fe <sub>2</sub> O <sub>3</sub> (%) | based on Fe <sub>2</sub> O <sub>3</sub> (%) |
| Fe <sub>2</sub> N/NGC1-1000 | 33.4                                          | 23.4                                        | 26.3                                        |
| Fe <sub>2</sub> N/NGC2-1000 | 13.7                                          | 9.6                                         | 10.8                                        |
| Fe <sub>2</sub> N/NGC3-1000 | 71.4                                          | 49.9                                        | 56.2                                        |

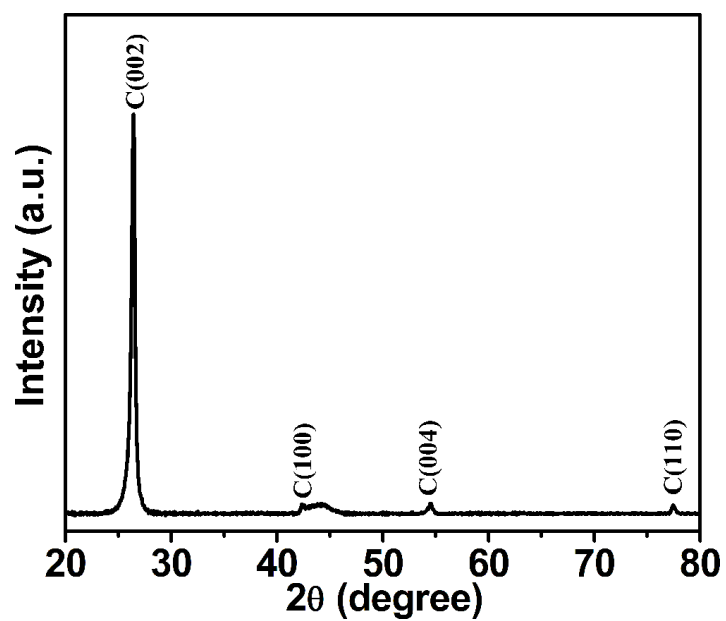

**Fig. S2.** XRD pattern of the NGC sample. NGC is prepared by using 3 M HCl to remove the metal NPs in Fe<sub>2</sub>N/NGC1-1000.

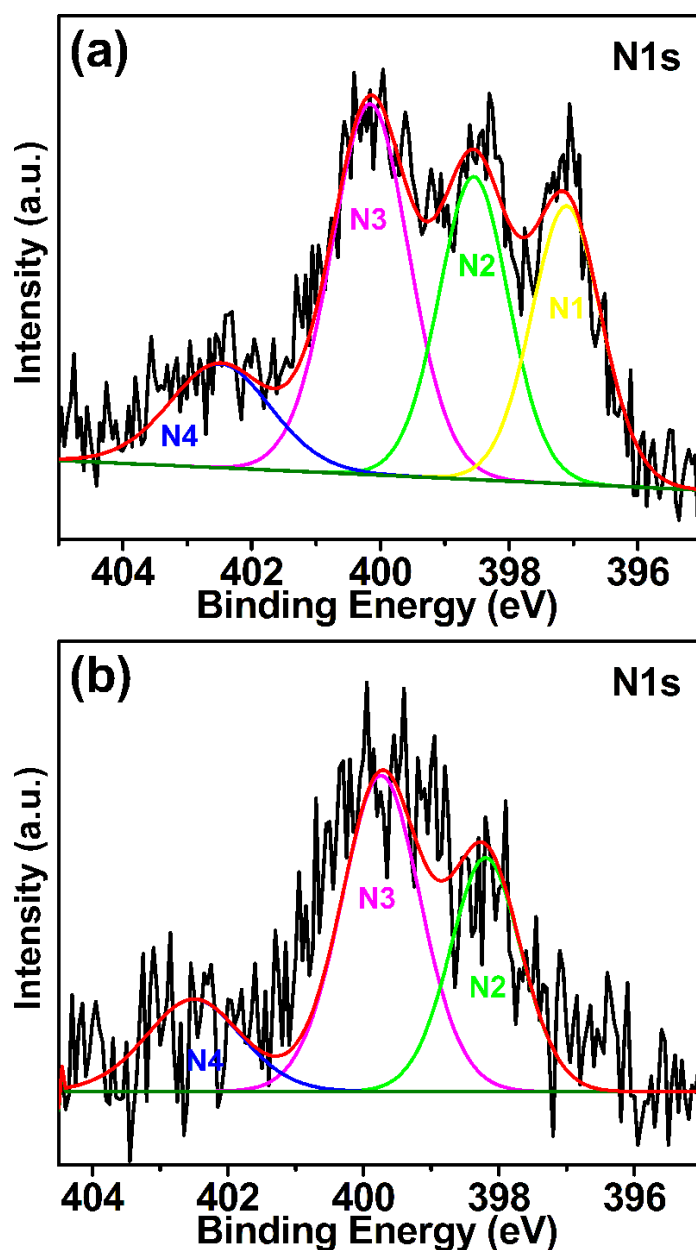

**Fig. S3** The high-resolution N1s XPS spectra of (a) Fe<sub>2</sub>N/NGC1-1000 and (b) NGC.

In order to confirm the existence of N-doping of graphitic carbon in the synthesized Fe<sub>2</sub>N/NGC sample, the high-resolution N1s XPS spectra of Fe<sub>2</sub>N/NGC1-1000 and NGC were analyzed as shown in Fig. S3. Compared to NGC, the N1s XPS spectra of Fe<sub>2</sub>N/NGC1-1000 exhibits the extra N1 peak at 397.1 eV,

which is the typical characteristic of metal nitride. After removal of Fe<sub>2</sub>N in Fe<sub>2</sub>N/NGC1-1000 by HCl, the N1s XPS spectra of NGC also exhibited the three major peaks of N2, N3 and N4, implying the nitrogen could be doped into the graphitic carbon during the ammoniated process. The peaks of N2 (398.5 eV) and N3 (400.2 eV) are assigned to pyridinic-N and pyrrolic-N, respectively.<sup>[S3, S4]</sup> The N4 peak at 402.5 eV is attributed to the nitrogen oxide functionalities (pyridinic-N<sup>+</sup>O<sup>-</sup>).<sup>[S5, S6]</sup>

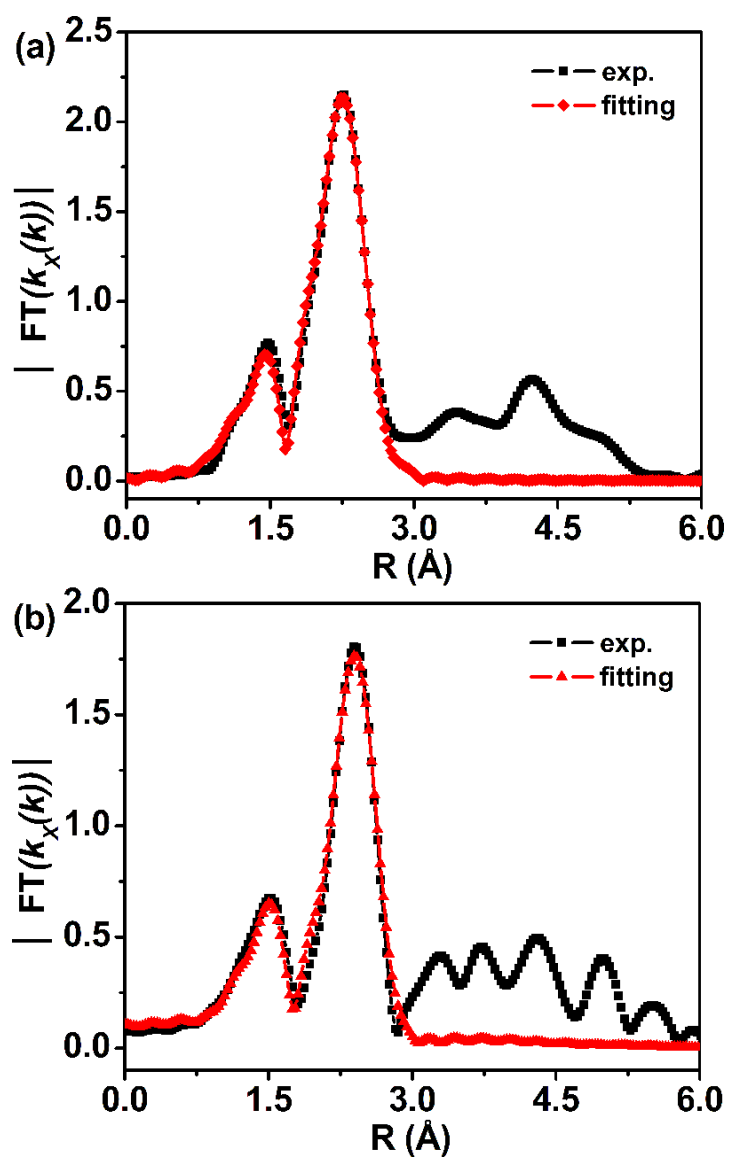

**Fig. S4.** Fourier transforms of experimental data (black line) and fit data (red line) for (a) Fe<sub>2</sub>N/NGC1-1000 and (b) Fe<sub>2</sub>N.

**Table S3** Fit parameters of EXAFS spectra for Fe<sub>2</sub>N/NGC1-1000 sample and standard Fe<sub>2</sub>N.

| samples                     | Shell | $N^{[a]}$ | $R^{[b]}$ | $\sigma^2 (10^{-3} \text{ \AA}^2)^{[c]}$ | $\Delta E_0 (\text{eV})^{[d]}$ |
|-----------------------------|-------|-----------|-----------|------------------------------------------|--------------------------------|
| Fe <sub>2</sub> N/NGC1-1000 | Fe-N  | 1.1±0.2   | 1.93±0.03 | 6.0±5.0                                  | 1.4±0.8                        |
|                             | Fe-Fe | 0.9±0.1   | 2.35±0.01 | 10.3±1.5                                 | -10.1±1.5                      |
|                             | Fe-Fe | 8.3±1.3   | 2.72±0.01 | 10.3±1.5                                 | -10.1±1.5                      |
| Fe <sub>2</sub> N           | Fe-N  | 0.9±0.2   | 1.93±0.01 | 1.9±1.6                                  | -3.8±0.8                       |
|                             | Fe-Fe | 6.5±1.1   | 2.73±0.02 | 8.7±0.5                                  | 10.8±2.2                       |

[a] Coordination number; [b] Distance between absorber and backscatterer atoms; [c] Debye–Waller factor; [d] Inner potential correction. Error bounds (accuracies) characterizing the structural parameters obtained by EXAFS spectroscopy are estimated as follows: coordination number  $N \pm 20\%$ ; distance  $R \pm 0.02 \text{ \AA}$ , Debye–Waller factor  $\sigma^2 \pm 10\%$ ; and inner potential correction  $\Delta E_0 \pm 20\%$ .

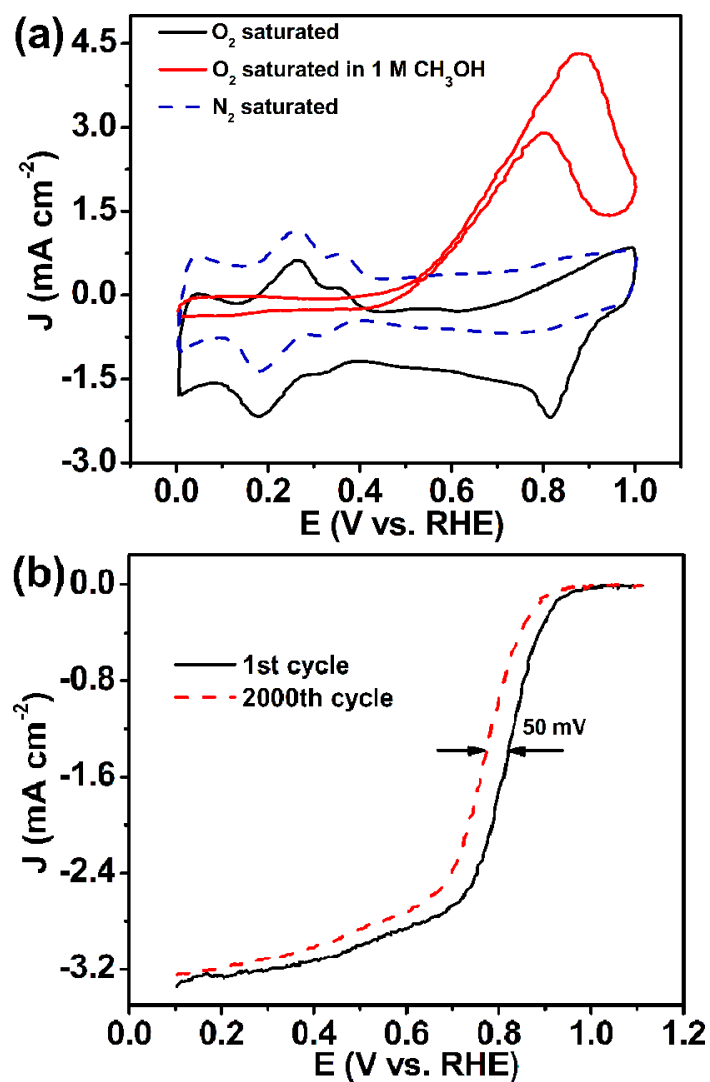

**Fig. S5.** (a) CV curves of commercial 20% Pt/C catalyst at a scan rate of 50 mV s<sup>-1</sup> in O<sub>2</sub>- or N<sub>2</sub>-saturated 0.1 M KOH solutions as well as O<sub>2</sub>-saturated 0.1 M KOH solution with 1 M CH<sub>3</sub>OH. (b) RDE voltammograms of Pt/C catalyst before and after 2000 cycles (rotation rate: 1600 rpm, scan rate: 5 mV s<sup>-1</sup>).

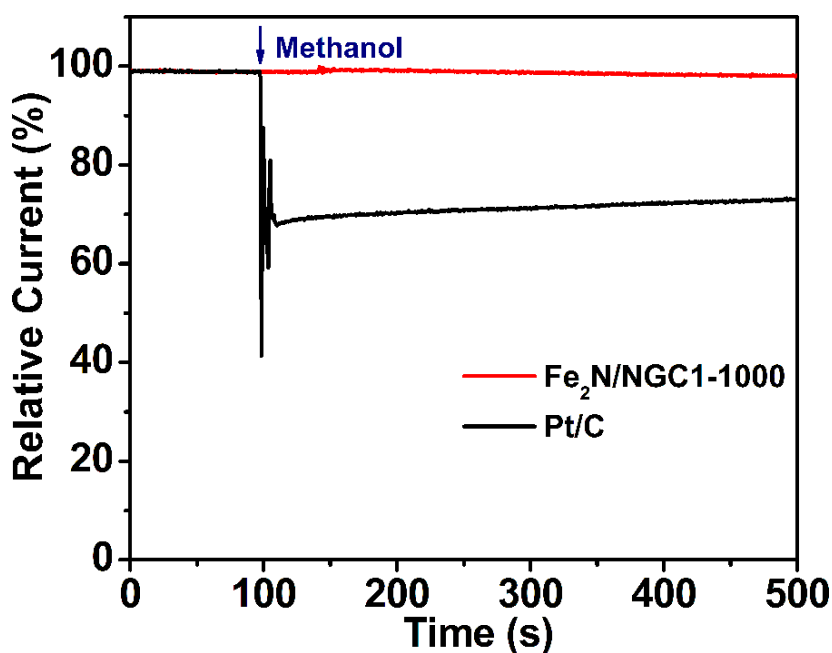

**Fig. S6** The relative ORR cathodic current–time response (1600 rpm) of the Fe<sub>2</sub>N/NGC1-1000 and Pt/C catalysts at 0.6 V in O<sub>2</sub>-saturated 0.1 M KOH before and after adding 1 M methanol.

Resistance to crossover effects and stability of the cathodic catalyst are greatly important considerations for their practical application to fuel cells. The current–time responses to methanol introduced into an O<sub>2</sub>-saturated electrolyte were measured for Fe<sub>2</sub>N/NGC1-1000 and Pt/C catalysts, respectively. As shown in Fig. S7, no noticeable change was observed in the ORR current at the Fe<sub>2</sub>N/NGC1-1000 catalyst after the addition of 1 M methanol to the O<sub>2</sub>-saturated 0.1 M KOH electrolyte. In contrast, the ORR current for the Pt/C catalyst decreased sharply. The above results indicate that Fe<sub>2</sub>N/NGC1-1000 exhibits high ORR selectivity and has a good ability for avoiding crossover effects, which is consistent with the CV curves (Fig. 3a).

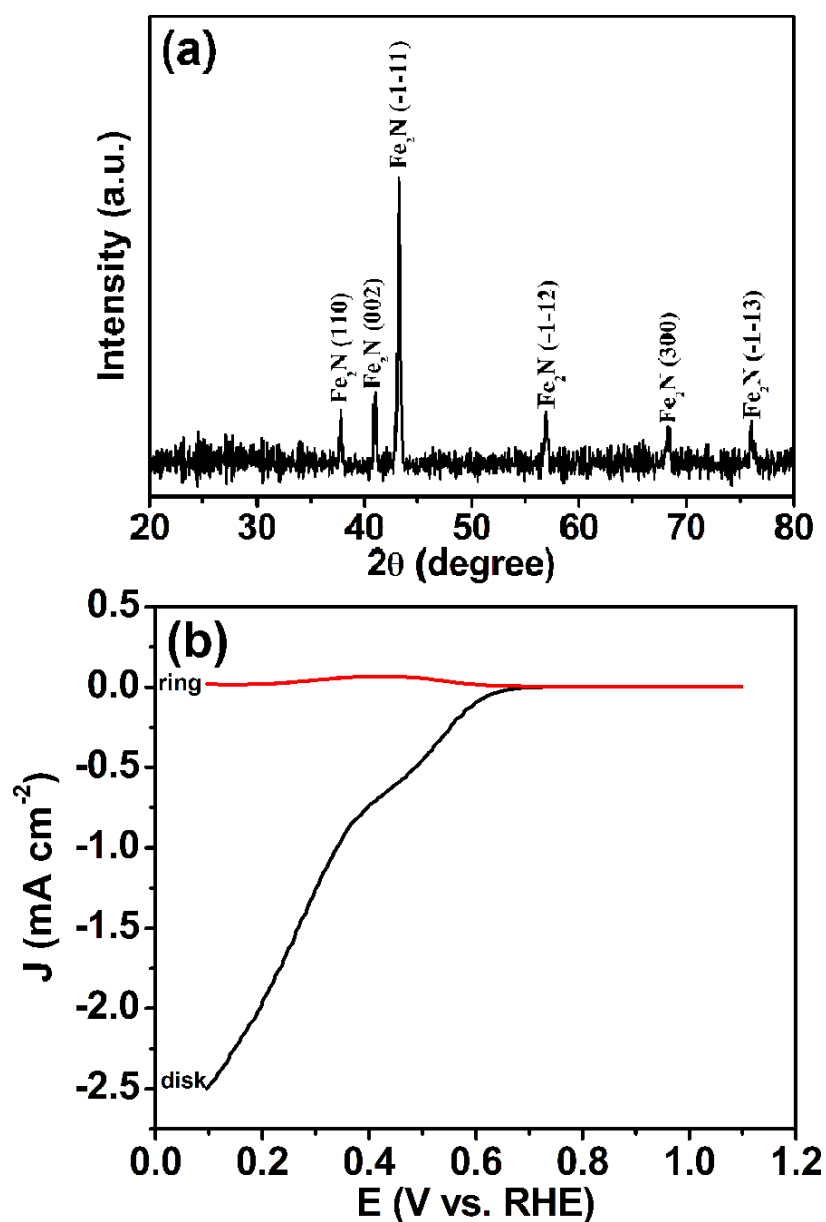

**Fig. S7.** (a) XRD pattern of the  $\text{Fe}_2\text{N}$  sample, which was prepared by treatment the commercial iron powder under ammonia at 1000 °C. (b) RRDE polarization curves of the  $\text{Fe}_2\text{N}$  catalyst in  $\text{O}_2$ -saturated 0.1 M KOH solution at a scan rate of  $5 \text{ mV s}^{-1}$  and a rotation rate of 1600 rpm.

Because the  $\text{Fe}_2\text{N}$  catalyst without graphene could not be obtained by the present

ion-exchanged method, so we prepare the Fe<sub>2</sub>N catalyst by treatment the commercial iron powder under ammonia at 1000 °C. The XRD pattern indicates the formation of Fe<sub>2</sub>N (Fig. S7a). The RRDE polarization curves of the synthesized Fe<sub>2</sub>N catalyst towards ORR was shown in Fig. S7b. It can be seen that the onset potential of ORR on the Fe<sub>2</sub>N electrode was only about 0.67 V (vs. RHE). The poor performance is attributed the following reasons: Firstly, the Fe<sub>2</sub>N derived from iron powder by a high-temperature treatment, resulting in the aggregation of Fe<sub>2</sub>N NPs because of without any support in it; Secondly, there is no NGC support in the catalyst, so the relative poor conductivity of Fe<sub>2</sub>N is not beneficial to the electron transport. The above reasons lead to the poor ORR performance of Fe<sub>2</sub>N catalyst.

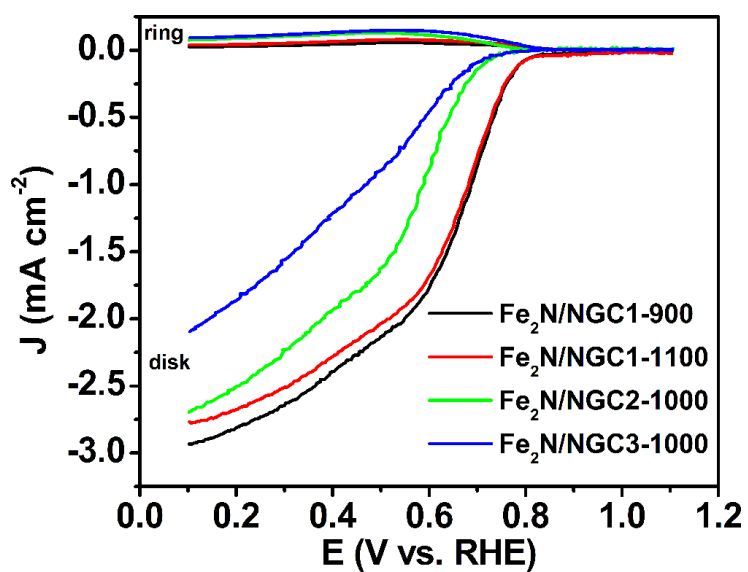

**Fig. S8.** RRDE polarization curves of the synthesized catalysts with different  $\text{Fe}_2\text{N}$  content and different heated temperature in  $\text{O}_2$ -saturated 0.1 M KOH solution at a scan rate of  $5 \text{ mV s}^{-1}$  and a rotation rate of 1600 rpm.

**Table S4** The ORR performance for the Fe<sub>2</sub>N/NGC and NGC catalysts.

| Catalysts                        | Onset potential<br>(V) | Kinetic current at 0.6 V<br>( <i>i<sub>k</sub></i> ) | Electrons transfer<br>number (n) |
|----------------------------------|------------------------|------------------------------------------------------|----------------------------------|
| Fe <sub>2</sub> N/NGC1-900       | 0.83                   | 7.9                                                  | 3.62                             |
| <b>Fe<sub>2</sub>N/NGC1-1000</b> | <b>0.84</b>            | <b>13.8</b>                                          | <b>3.98</b>                      |
| Fe <sub>2</sub> N/NGC1-1100      | 0.83                   | 6.5                                                  | 3.56                             |
| Fe <sub>2</sub> N/NGC2-1000      | 0.77                   | 2.3                                                  | 3.41                             |
| Fe <sub>2</sub> N/NGC3-1000      | 0.76                   | 1.5                                                  | 3.26                             |
| NGC                              | 0.73                   | 1.3                                                  | 3.02                             |
| Pt/C                             | 0.95                   | 13.6                                                 | 4.0                              |

## References:

- [S1] B. Ravel and M. Newville. *J. Synchrotron Radiat.*, 2005, **12**, 537.
- [S2] Z. Lin, G. Waller, Y. Liu, M. Liu, and C. Wong, *Adv. Energy Mater.*, 2012, **2**, 884.
- [S3] R. L. Liu, D. Q. Wu, X. L. Feng and K. Müllen, *Angew. Chem. Int. Ed.*, 2010, **49**, 2565.
- [S4] H. Zhong, H. Zhang, Z. Xu, Y. Tang and J. Mao, *ChemSusChem*, 2012, **5**, 1698.
- [S5] E. Biddinger, D. von Deak and U. Ozkan, *Top. Catal.*, 2009, **52**, 1566.
- [S6] T. Sharifi, G. Hu, X. Jia and T. Wågberg, *ACS Nano*, 2012, **6**, 8904.
